# Supplementary material for: Horizontal gene transfer from flowering plants to Gnetum
Source: HighWire-hosted journal article supplement (doi:10.1073/pnas.1833775100), 2003-09-08
Supplement: 3775Table6.pdf [file 3775Table6.pdf]

Table 6. Age (in million years) estimates for *Gnetum* lineages

| Model                                                   | a   | b   | c  | d | e |
|---------------------------------------------------------|-----|-----|----|---|---|
| Fossil constraint via <i>Gurvanella</i> (a = 125 my)    |     |     |    |   |   |
| <i>Psilotum</i> as outgroup                             | 125 | 72  | 6  | 6 | 5 |
| <i>Ephedra</i> as outgroup                              | 125 | 70  | 6  | 5 | 2 |
| Angiosperms as outgroup                                 | 125 | 78  | 7  | 6 | 3 |
| Fossil constraint via seedling macrofossil (b = 115 my) |     |     |    |   |   |
| <i>Psilotum</i> as outgroup                             | 201 | 115 | 10 | 9 | 4 |
| <i>Ephedra</i> as outgroup                              | 205 | 115 | 10 | 9 | 4 |
| Angiosperms as outgroup                                 | 184 | 115 | 11 | 9 | 4 |

a, b, c, d, and e refer to nodes in Fig. 3C. See *Age Estimation* for details
